# Supplementary material for: Sustainable Pest Management Using Novel Nanoemulsions of Honeysuckle and Patchouli Essential Oils against the West Nile Virus Vector, Culex pipiens, under Laboratory and Field Conditions
Source: MDPI journal article supplement (doi:10.3390/plants12213682), 2023-10-25

**Table S1.** Kruskal–Walli’s test for larval mosquito mortality (%) of plant oil groups

| Oil groups | Mortality % (mean±SD) |            |            |            |            |             |
|------------|-----------------------|------------|------------|------------|------------|-------------|
|            | 0.0                   | 3          | 6          | 12         | 24         | 48          |
| Low        | 0±0                   | 25.28±2.79 | 40.16±3.76 | 56.64±4.34 | 70.24±3.58 | 86.40±3.48  |
| Medium     | 0±0                   | 34.51±1.08 | 57.03±2.07 | 78.29±1.84 | 88.23±1.15 | 97.14±1.33  |
| High       | 0±0                   | 46.40±3.08 | 72.40±3.37 | 89.60±2.29 | 97.60±1.42 | 100.00±0.00 |
| Chi-square | 0.0                   | 21.15      | 24.15      | 27.44      | 29.16      | 32.15       |
| df         | 2                     | 2          | 2          | 2          | 2          | 2           |
| Asymp. sig | 0.000                 | 0.000      | 0.000      | 0.000      | 0.000      | 0.002       |

**Table S2.** The major chemical constituents of *Citrus aurantium* essential oil

| No. | RT    | Compound name    | Area (%)     | R. I. | M. F.                             | Classification |
|-----|-------|------------------|--------------|-------|-----------------------------------|----------------|
| 1   | 4.88  | $\alpha$ -Pinene | 1.40         | 937   | C <sub>10</sub> H <sub>16</sub>   | monoterpene    |
| 2   | 5.82  | Sabinene         | 0.80         | 974   | C <sub>10</sub> H <sub>16</sub>   | monoterpene    |
| 3   | 6.26  | $\beta$ -Myrcene | 2.11         | 967   | C <sub>10</sub> H <sub>16</sub>   | monoterpene    |
| 4   | 7.24  | $\beta$ -Cymene  | 0.66         | 1042  | C <sub>10</sub> H <sub>14</sub>   | monoterpene    |
| 5   | 7.40  | Limonene         | <b>91.35</b> | 1030  | C <sub>10</sub> H <sub>16</sub>   | monoterpene    |
| 6   | 8.22  | Terpinolene      | <b>1.12</b>  | 1088  | C <sub>10</sub> H <sub>16</sub>   | monoterpene    |
| 7   | 12.77 | Estragole        | 1.70         | 1196  | C <sub>10</sub> H <sub>12</sub> O | phenylpropene  |

**Table S3.** The major chemical constituents of *Cymbopogon schoenanthus* essential oil

| No. | RT    | Compound name                       | Area (%)     | R. I. | M. F.                                          | Classification |
|-----|-------|-------------------------------------|--------------|-------|------------------------------------------------|----------------|
| 1   | 2.02  | 1-Octanol, 2,7-dimethyl             | 1.15         | 975   | C <sub>10</sub> H <sub>22</sub> O              | fatty alcohol  |
| 2   | 6.26  | $\beta$ -Myrcene                    | 6.27         | 967   | C <sub>10</sub> H <sub>16</sub>                | monoterpene    |
| 3   | 9.58  | Linalool                            | 1.23         | 1099  | C <sub>10</sub> H <sub>18</sub> O              | monoterpene    |
| 4   | 12.16 | Isocitral                           | 2.63         | 989   | C <sub>10</sub> H <sub>16</sub> O              | monoterpene    |
| 5   | 12.75 | Estragole                           | 1.70         | 1196  | C <sub>10</sub> H <sub>12</sub> O              | phenylpropene  |
| 6   | 14.06 | Neral                               | <b>38.04</b> | 1240  | C <sub>10</sub> H <sub>16</sub> O              | monoterpene    |
| 7   | 14.52 | Geraniol                            | 4.10         | 998   | C <sub>10</sub> H <sub>18</sub> O              | monoterpene    |
| 8   | 14.52 | Neryl alcohol                       | 5.33         | 1228  | C <sub>10</sub> H <sub>18</sub> O              | monoterpene    |
| 9   | 15.05 | 2,6-Octadienal, 3,7-dimethyl-, (e)- | <b>39.89</b> | 1270  | C <sub>10</sub> H <sub>16</sub> O              | monoterpene    |
| 10  | 18.54 | Geranyl acetate                     | 3.38         | 1382  | C <sub>12</sub> H <sub>20</sub> O <sub>2</sub> | monoterpene    |
| 11  | 20.16 | Trans- $\alpha$ -Bergamotene        | 0.47         | 1435  | C <sub>15</sub> H <sub>24</sub>                | sesquiterpene  |

**Table S4.** The major chemical constituents of *Lavandula angustifolia* essential oil

| No. | RT    | Compound name           | Area (%)     | R. I. | M. F.                                          | Classification |
|-----|-------|-------------------------|--------------|-------|------------------------------------------------|----------------|
| 1   | 2.02  | 1-Octanol, 2,7-dimethyl | 0.59         | 965   | C <sub>10</sub> H <sub>22</sub> O              | fatty alcohol  |
| 2   | 7.23  | O-cymene                | 0.39         | 1022  | C <sub>10</sub> H <sub>14</sub>                | phenol         |
| 3   | 7.43  | Eucalyptol              | 1.69         | 1032  | C <sub>10</sub> H <sub>18</sub> O              | monoterpene    |
| 4   | 8.62  | Linalool oxide          | 1.56         | 1124  | C <sub>10</sub> H <sub>18</sub> O <sub>2</sub> | monoterpene    |
| 5   | 9.61  | Linalool                | <b>30.42</b> | 1099  | C <sub>10</sub> H <sub>18</sub> O              | monoterpene    |
| 6   | 11.65 | Lavandulol              | 0.88         | 1025  | C <sub>10</sub> H <sub>18</sub> O              | monoterpene    |
| 7   | 11.85 | Borneol                 | 1.01         | 988   | C <sub>10</sub> H <sub>18</sub> O              | monoterpene    |
| 8   | 12.14 | Terpinen-4-ol           | 5.72         | 1260  | C <sub>10</sub> H <sub>18</sub> O              | monoterpene    |
| 9   | 12.65 | $\beta$ -Fenchol        | 1.28         | 980   | C <sub>10</sub> H <sub>18</sub> O              | monoterpene    |

|    |       |                         |              |      |                                                |               |
|----|-------|-------------------------|--------------|------|------------------------------------------------|---------------|
| 10 | 12.76 | Estragole               | 1.40         | 1196 | C <sub>10</sub> H <sub>12</sub> O              | phenylpropene |
| 11 | 14.45 | Linalyl acetate         | <b>42.28</b> | 1257 | C <sub>12</sub> H <sub>20</sub> O <sub>2</sub> | monoterpene   |
| 12 | 15.54 | Lavandulol acetate      | <b>4.36</b>  | 1257 | C <sub>12</sub> H <sub>20</sub> O <sub>2</sub> | monoterpene   |
| 13 | 18.55 | Geranyl acetate         | <b>0.49</b>  | 1382 | C <sub>12</sub> H <sub>20</sub> O <sub>2</sub> | monoterpene   |
| 14 | 19.68 | Caryophyllene           | 2.98         | 1419 | C <sub>15</sub> H <sub>24</sub>                | sesquiterpene |
| 15 | 20.83 | Cis- $\beta$ -Farnesene | 1.62         | 1589 | C <sub>15</sub> H <sub>24</sub>                | sesquiterpene |
| 16 | 24.50 | Caryophyllene oxide     | 3.33         | 1581 | C <sub>15</sub> H <sub>24</sub> O              | sesquiterpene |

**Table S5.** The major chemical constituents of *Narcissus tazetta* essential oil

| No. | RT    | Compound name                                          | Area (%)     | R. I. | M. F.                                          | Classification   |
|-----|-------|--------------------------------------------------------|--------------|-------|------------------------------------------------|------------------|
| 1   | 4.36  | $\beta$ -pinene                                        | 0.35         | 974   | C <sub>10</sub> H <sub>16</sub>                | monoterpene      |
| 2   | 5.24  | $\beta$ -Cymene                                        | 0.11         | 1042  | C <sub>10</sub> H <sub>14</sub>                | monoterpene      |
| 3   | 5.35  | D-Limonene                                             | 2.34         | 1030  | C <sub>10</sub> H <sub>16</sub>                | monoterpene      |
| 4   | 6.97  | Linalool                                               | 5.51         | 1099  | C <sub>10</sub> H <sub>18</sub> O              | monoterpene      |
| 5   | 7.29  | Phenylethyl alcohol                                    | 0.42         | 914   | C <sub>8</sub> H <sub>10</sub> O               | phenyl           |
| 6   | 8.15  | $\beta$ -Terpineol                                     | 0.16         | 1150  | C <sub>10</sub> H <sub>18</sub> O              | monoterpene      |
| 7   | 8.44  | Acetic acid, phenylmethyl ester                        | 1.35         | 1164  | C <sub>9</sub> H <sub>10</sub> O <sub>2</sub>  | phenol           |
| 8   | 9.10  | Phenylethyl acetate                                    | 0.12         | 1357  | C <sub>10</sub> H <sub>12</sub> O <sub>2</sub> | Phenylpropene    |
| 9   | 9.32  | $\alpha$ -Terpineol                                    | 1.62         | 1260  | C <sub>10</sub> H <sub>18</sub> O              | monoterpene      |
| 10  | 9.45  | Geraniol                                               | 2.04         | 998   | C <sub>10</sub> H <sub>18</sub> O              | monoterpene      |
| 11  | 9.91  | Butanoic acid, 1-methyloctyl ester                     | 3.50         | 1486  | C <sub>13</sub> H <sub>26</sub> O <sub>2</sub> | flavonoid        |
| 12  | 10.16 | Citronellol                                            | <b>7.39</b>  | 1135  | C <sub>10</sub> H <sub>20</sub> O              | monoterpene      |
| 13  | 11.66 | Estragole                                              | 0.39         | 1196  | C <sub>10</sub> H <sub>12</sub> O              | phenylpropene    |
| 14  | 13.05 | Methyl anthranilate                                    | 0.85         | 1320  | C <sub>8</sub> H <sub>9</sub> NO <sub>2</sub>  | anthranilic acid |
| 15  | 13.34 | Eugenol                                                | 0.21         | 1357  | C <sub>10</sub> H <sub>12</sub> O <sub>2</sub> | phenylpropene    |
| 16  | 13.95 | Geranyl acetate                                        | 0.16         | 1382  | C <sub>12</sub> H <sub>20</sub> O <sub>2</sub> | monoterpene      |
| 17  | 14.68 | $\beta$ -Ionone                                        | 0.14         | 1486  | C <sub>13</sub> H <sub>20</sub> O              | flavonoid        |
| 18  | 14.96 | Caryophyllene                                          | 0.44         | 1419  | C <sub>15</sub> H <sub>24</sub>                | sesquiterpene    |
| 19  | 15.30 | Dihydro- $\beta$ -ionone                               | 1.43         | 1245  | C <sub>13</sub> H <sub>22</sub> O              | phenol           |
| 20  | 15.97 | Cyclamen aldehyde                                      | 0.43         | 1330  | C <sub>13</sub> H <sub>18</sub> O              | fatty acid       |
| 21  | 16.46 | Germacrene D                                           | 0.60         | 1435  | C <sub>15</sub> H <sub>24</sub>                | polyphenol       |
| 22  | 16.61 | Benzyl dimethylcarbinyl butyrate                       | 0.82         | 1370  | C <sub>14</sub> H <sub>20</sub> O <sub>2</sub> | flavonoid        |
| 23  | 17.06 | $\alpha$ -Farnesene                                    | 0.68         | 1419  | C <sub>15</sub> H <sub>24</sub>                | sesquiterpene    |
| 24  | 17.32 | 2-Phenoxyethyl isobutyrate                             | 0.63         | 1346  | C <sub>12</sub> H <sub>16</sub> O <sub>3</sub> | phenol ether     |
| 25  | 19.08 | Diethyl phthalate                                      | <b>13.35</b> | 1594  | C <sub>12</sub> H <sub>14</sub> O <sub>4</sub> | phthalic acid    |
| 26  | 19.76 | Cedrenol                                               | 1.31         | 1581  | C <sub>15</sub> H <sub>24</sub> O              | sesquiterpene    |
| 27  | 19.93 | Methyl- $\beta$ -ionone                                | 8.00         | 1480  | C <sub>14</sub> H <sub>22</sub> O              | sesquiterpene    |
| 28  | 20.22 | Dihydro-3-oxo- $\beta$ -ionol                          | 0.21         | 1320  | C <sub>13</sub> H <sub>22</sub> O <sub>2</sub> | phenol           |
| 29  | 20.52 | Methyl dihydrojasmonate                                | <b>11.36</b> | 1649  | C <sub>13</sub> H <sub>22</sub> O <sub>3</sub> | ketone           |
| 30  | 20.85 | Cis-3-Hexenyl salicylate                               | 1.16         | 1211  | C <sub>13</sub> H <sub>16</sub> O <sub>3</sub> | phenol           |
| 31  | 21.32 | $\beta$ -Ionone                                        | 2.55         | 1456  | C <sub>14</sub> H <sub>22</sub> O              | sesquiterpene    |
| 32  | 21.89 | Trans-farnesol                                         | 0.22         | 1522  | C <sub>15</sub> H <sub>26</sub> O              | sesquiterpene    |
| 33  | 22.50 | Cinnamaldehyde, $\alpha$ -hexyl                        | 3.04         | 1427  | C <sub>15</sub> H <sub>20</sub> O              | phenol           |
| 34  | 22.90 | Acetyl cedrene                                         | 4.39         | 1645  | C <sub>17</sub> H <sub>26</sub> O              | ketone           |
| 35  | 23.65 | 6,7-diethyl-1,1,4,4-tetramethyl-2,3-dihydronaphthalene | 4.74         | 1861  | C <sub>18</sub> H <sub>28</sub>                | phenol           |
| 36  | 24.49 | 7-Acetyl-6-ethyl-1,1,4,4-tetramethyltetralin           | <b>17.98</b> | 1851  | C <sub>18</sub> H <sub>26</sub> O              | phenol           |

**Table S6.** The major chemical constituents of *Origanum majorana* essential oil

| No. | RT | Compound name | Area (%) | R. I. | M. F. | Classification |
|-----|----|---------------|----------|-------|-------|----------------|
|-----|----|---------------|----------|-------|-------|----------------|

|    |       |                                                      |              |      |                                                |               |
|----|-------|------------------------------------------------------|--------------|------|------------------------------------------------|---------------|
| 1  | 4.71  | Bicyclo[3.1.0]hex-2-ene, 4-methyl-1-(1-methylethyl)- | 0.65         | 974  | C <sub>10</sub> H <sub>16</sub>                | monoterpene   |
| 2  | 4.87  | $\alpha$ -Pinene                                     | 1.36         | 937  | C <sub>10</sub> H <sub>16</sub>                | monoterpene   |
| 3  | 5.82  | Sabinene                                             | 7.59         | 974  | C <sub>10</sub> H <sub>16</sub>                | monoterpene   |
| 4  | 6.26  | $\alpha$ -Myrcene                                    | 1.21         | 1030 | C <sub>10</sub> H <sub>16</sub>                | monoterpene   |
| 5  | 6.70  | $\alpha$ -Phellandrene                               | 0.33         | 955  | C <sub>10</sub> H <sub>16</sub>                | monoterpene   |
| 6  | 7.00  | $\alpha$ -Terpinene                                  | <b>7.82</b>  | 974  | C <sub>10</sub> H <sub>16</sub>                | monoterpene   |
| 7  | 7.23  | M-Cymene                                             | 3.13         | 1042 | C <sub>10</sub> H <sub>14</sub>                | monoterpene   |
| 8  | 7.37  | D-Limonene                                           | 4.77         | 1030 | C <sub>10</sub> H <sub>16</sub>                | monoterpene   |
| 9  | 8.23  | $\gamma$ -Terpinene                                  | <b>11.69</b> | 1060 | C <sub>10</sub> H <sub>16</sub>                | monoterpene   |
| 10 | 8.62  | Cis-4-Thujanol                                       | <b>19.70</b> | 1090 | C <sub>10</sub> H <sub>18</sub> O              | monoterpene   |
| 11 | 9.06  | Terpinolene                                          | 2.85         | 1088 | C <sub>10</sub> H <sub>16</sub>                | monoterpene   |
| 12 | 10.91 | 1-Terpinenol                                         | 0.86         | 1099 | C <sub>10</sub> H <sub>18</sub> O              | monoterpene   |
| 13 | 12.16 | Terpinen-4-ol                                        | <b>23.50</b> | 1260 | C <sub>10</sub> H <sub>18</sub> O              | monoterpene   |
| 14 | 12.65 | $\alpha$ -Terpinyl acetate                           | 4.52         | 2110 | C <sub>10</sub> H <sub>18</sub> O              | monoterpene   |
| 15 | 13.11 | Piperitol                                            | 0.43         | 1190 | C <sub>10</sub> H <sub>18</sub> O              | monoterpene   |
| 16 | 14.42 | Linalyl acetate                                      | 2.83         | 1257 | C <sub>12</sub> H <sub>20</sub> O <sub>2</sub> | monoterpene   |
| 17 | 19.68 | Caryophyllene                                        | 3.83         | 1419 | C <sub>15</sub> H <sub>24</sub>                | sesquiterpene |
| 18 | 22.00 | Bicyclogermacrene                                    | 2.09         | 1419 | C <sub>15</sub> H <sub>24</sub>                | sesquiterpene |
| 19 | 24.40 | Sathulenol                                           | 0.24         | 1581 | C <sub>15</sub> H <sub>24</sub> O              | sesquiterpene |

**Table S7.** The major chemical constituents of *Pelargonium graveolens* essential oil

| No. | RT    | Compound name                                      | Area (%)     | R. I. | M. F.                                                         | Classification    |
|-----|-------|----------------------------------------------------|--------------|-------|---------------------------------------------------------------|-------------------|
| 1   | 5.36  | 2-Propanol, 1,1'-oxydi                             | 7.26         | 1046  | C <sub>6</sub> H <sub>14</sub> O <sub>3</sub>                 | phenol            |
| 2   | 5.88  | 1-Propanol, 2-(2-hydroxypropoxy)                   | <b>15.77</b> | 1046  | C <sub>6</sub> H <sub>14</sub> O <sub>3</sub>                 | phenol            |
| 3   | 6.69  | Malonic acid                                       | 1.85         | 345   | C <sub>3</sub> H <sub>4</sub> O                               | malonate          |
| 4   | 6.94  | Linalool                                           | 0.29         | 1099  | C <sub>10</sub> H <sub>18</sub> O                             | monoterpene       |
| 5   | 7.45  | Phenylethyl alcohol                                | <b>35.51</b> | 914   | C <sub>8</sub> H <sub>10</sub> O                              | phenyl            |
| 6   | 8.29  | Menthone                                           | 0.09         | 1135  | C <sub>10</sub> H <sub>18</sub> O                             | monoterpene       |
| 7   | 8.45  | Acetic acid, phenylmethyl ester                    | 3.17         | 1164  | C <sub>9</sub> H <sub>10</sub> O <sub>2</sub>                 | phenol            |
| 8   | 8.76  | Benzenepropanoic acid, methyl ester                | 1.61         | 1224  | C <sub>9</sub> H <sub>10</sub> O <sub>2</sub>                 | phenol            |
| 9   | 9.86  | $\alpha$ -Citronellol                              | 0.13         | 1135  | C <sub>10</sub> H <sub>20</sub> O                             | fatty alcohol     |
| 10  | 10.15 | $\beta$ -Citronellol                               | <b>7.60</b>  | 1135  | C <sub>10</sub> H <sub>20</sub> O                             | monoterpene       |
| 11  | 10.25 | 3-Phenylpropanol                                   | 1.66         | 1340  | C <sub>9</sub> H <sub>12</sub> O                              | phenol            |
| 12  | 10.75 | Geraniol                                           | 3.08         | 998   | C <sub>10</sub> H <sub>18</sub> O                             | monoterpene       |
| 13  | 12.33 | Benzeneethanol, $\alpha,\alpha$ -dimethyl, acetate | 1.51         | 1298  | C <sub>12</sub> H <sub>16</sub> O <sub>2</sub>                | flavonoid         |
| 14  | 13.23 | Citronellol acetate                                | 0.17         | 1298  | C <sub>12</sub> H <sub>22</sub> O <sub>2</sub>                | monoterpene       |
| 15  | 15.04 | $\beta$ -Ionone                                    | 3.13         | 1486  | C <sub>13</sub> H <sub>20</sub> O                             | flavonoid         |
| 16  | 16.29 | 2(E)-Decenal                                       | 1.66         | 960   | C <sub>10</sub> H <sub>18</sub> O                             | aldehyde          |
| 17  | 16.42 | Trans- $\beta$ -Ionone                             | 1.82         | 1486  | C <sub>13</sub> H <sub>20</sub> O                             | flavonoid         |
| 18  | 16.83 | 9-Octadecenoic acid (z)                            | 0.15         | 2175  | C <sub>18</sub> H <sub>34</sub> O <sub>2</sub>                | Oleic acid        |
| 19  | 18.03 | Rose acetate                                       | 3.24         | 1094  | C <sub>10</sub> H <sub>9</sub> Cl <sub>3</sub> O <sub>2</sub> | fatty acid        |
| 20  | 20.39 | Methyl dihydrojasmonate                            | 0.62         | 1649  | C <sub>13</sub> H <sub>22</sub> O <sub>3</sub>                | ketone            |
| 21  | 25.89 | Benzeneacetic acid, 2-phenylethyl ester            | <b>9.68</b>  | 1909  | C <sub>16</sub> H <sub>16</sub> O <sub>2</sub>                | Phenylacetic acid |

**Table S8.** The major chemical constituents of *Punica granatum* essential oil

| No. | RT    | Compound name                  | Area (%) | R. I. | M. F.                                          | Classification      |
|-----|-------|--------------------------------|----------|-------|------------------------------------------------|---------------------|
| 1   | 13.27 | Tetradecane, 2,6,10-trimethyl- | 2.24     | 1780  | C <sub>17</sub> H <sub>36</sub>                | alkane              |
| 2   | 15.20 | Ambreinolide                   | 0.59     | 1645  | C <sub>17</sub> H <sub>28</sub> O <sub>2</sub> | $\alpha$ -keto acid |

|    |       |                                     |       |      |                                                |               |
|----|-------|-------------------------------------|-------|------|------------------------------------------------|---------------|
| 3  | 15.73 | 3,7,11-Trimethyl-1-dodecanol        | 3.40  | 1755 | C <sub>17</sub> H <sub>36</sub>                | alkane        |
| 4  | 15.73 | 1-Tetradecanol                      | 0.45  | 1386 | C <sub>14</sub> H <sub>30</sub> O              | fatty alcohol |
| 5  | 16.10 | Docosane                            | 1.88  | 1876 | C <sub>22</sub> H <sub>46</sub>                | alkanes       |
| 6  | 16.27 | Tetradecane, 2,6,10-trimethyl       | 3.34  | 1780 | C <sub>17</sub> H <sub>36</sub>                | alkane        |
| 7  | 17.62 | 2-Hexadecanol                       | 0.38  | 1890 | C <sub>16</sub> H <sub>34</sub> O              | fatty alcohol |
| 8  | 18.48 | Heptacosane                         | 0.89  | 1986 | C <sub>27</sub> H <sub>56</sub>                | alkane        |
| 9  | 18.64 | 3-methyl-pentadecane                | 1.29  | 1925 | C <sub>16</sub> H <sub>34</sub>                | alkane        |
| 10 | 18.97 | Diethyl Phthalate                   | 27.97 | 1594 | C <sub>12</sub> H <sub>14</sub> O <sub>4</sub> | Phthalic acid |
| 11 | 19.32 | 14-β-H-pregna                       | 42.39 | 2520 | C <sub>21</sub> H <sub>36</sub>                | fatty acid    |
| 12 | 20.33 | 1-(4-Bromobutyl)-2-piperidinone     | 2.99  | 1635 | C <sub>9</sub> H <sub>16</sub> BrNO            | fatty acid    |
| 13 | 20.86 | Hexadecahydropyrene                 | 3.85  | 1502 | C <sub>16</sub> H <sub>26</sub>                | fatty acid    |
| 14 | 21.97 | Isocritonilide                      | 7.50  | 1415 | C <sub>15</sub> H <sub>20</sub> O <sub>2</sub> | sesquiterpene |
| 15 | 23.27 | 2-Methyl-E,E-3,13-octadecadien-1-ol | 1.20  | 2104 | C <sub>19</sub> H <sub>36</sub> O              | fatty acid    |

**Table S9.** The major chemical constituents of *Ricinus communis* essential oil

| No. | RT    | Compound name                                        | Area (%) | R. I. | M. F.                                             | Classification |
|-----|-------|------------------------------------------------------|----------|-------|---------------------------------------------------|----------------|
| 1   | 2.02  | Cyclobutane, 1,1-dimethyl-2-octyl                    | 31.33    | 913   | C <sub>14</sub> H <sub>28</sub>                   | cycloalkane    |
| 2   | 7.35  | β-Pinene                                             | 7.27     | 937   | C <sub>10</sub> H <sub>16</sub>                   | monoterpene    |
| 3   | 7.41  | Eucalyptol                                           | 7.30     | 1032  | C <sub>10</sub> H <sub>18</sub>                   | monoterpene    |
| 4   | 9.60  | 2-Methyl-1-Hexadecanol                               | 4.10     | 1830  | C <sub>17</sub> H <sub>36</sub> O                 | alkane         |
| 5   | 10.95 | Chamazulene                                          | 6.44     | 1420  | C <sub>14</sub> H <sub>16</sub>                   | phenol         |
| 6   | 12.15 | Terpinen-4-ol                                        | 6.63     | 1260  | C <sub>10</sub> H <sub>18</sub> O                 | monoterpene    |
| 7   | 12.80 | Estragole                                            | 24.95    | 1196  | C <sub>10</sub> H <sub>12</sub> O                 | phenylpropene  |
| 8   | 33.82 | Oxiraneundecanoic acid, 3-pentyl-, methyl ester, cis | 4.77     | 1775  | C <sub>19</sub> H <sub>36</sub> O                 | fatty acid     |
| 9   | 36.65 | Hexadecanoic acid, trimethylsilyl ester              | 3.85     | 2215  | C <sub>19</sub> H <sub>40</sub> O <sub>2</sub> Si | palmitic acid  |
| 10  | 37.84 | 9-Octadecenoic acid (z)                              | 3.36     | 2175  | C <sub>18</sub> H <sub>34</sub> O <sub>2</sub>    | oleic acid     |

**Table S10.** The major chemical constituents of *Rosmarinus officinalis* essential oil

| No. | RT    | Compound name                     | Area (%) | R. I. | M. F.                             | Classification |
|-----|-------|-----------------------------------|----------|-------|-----------------------------------|----------------|
| 1   | 2.02  | Cyclobutane, 1,1-dimethyl-2-octyl | 0.47     | 913   | C <sub>14</sub> H <sub>28</sub>   | cycloalkane    |
| 2   | 4.63  | Tricyclene                        | 1.63     | 937   | C <sub>10</sub> H <sub>16</sub>   | monoterpene    |
| 3   | 4.87  | α-Pinene                          | 20.85    | 937   | C <sub>10</sub> H <sub>16</sub>   | monoterpene    |
| 4   | 5.25  | Camphene                          | 8.04     | 952   | C <sub>10</sub> H <sub>16</sub>   | monoterpene    |
| 5   | 5.93  | β-Pinene                          | 6.69     | 988   | C <sub>10</sub> H <sub>16</sub>   | monoterpene    |
| 6   | 6.25  | β-Myrcene                         | 0.42     | 967   | C <sub>10</sub> H <sub>16</sub>   | monoterpene    |
| 7   | 6.77  | 3-Carene                          | 3.53     | 952   | C <sub>10</sub> H <sub>16</sub>   | monoterpene    |
| 8   | 6.94  | 1,4-Cineole                       | 0.32     | 1099  | C <sub>10</sub> H <sub>18</sub> O | monoterpene    |
| 9   | 7.23  | O-Cymene                          | 4.49     | 1022  | C <sub>10</sub> H <sub>14</sub>   | phenol         |
| 10  | 7.42  | Eucalyptol                        | 20.45    | 1032  | C <sub>10</sub> H <sub>18</sub>   | monoterpene    |
| 11  | 8.22  | γ-Terpinene                       | 2.96     | 976   | C <sub>10</sub> H <sub>16</sub>   | monoterpene    |
| 12  | 9.59  | Linalool                          | 1.54     | 1099  | C <sub>10</sub> H <sub>18</sub> O | monoterpene    |
| 13  | 10.95 | Camphor                           | 14.65    | 937   | C <sub>10</sub> H <sub>16</sub> O | monoterpene    |
| 14  | 11.54 | Borneol                           | 11.32    | 1150  | C <sub>10</sub> H <sub>18</sub> O | monoterpene    |
| 15  | 12.13 | Terpinen-4-ol                     | 1.98     | 1260  | C <sub>10</sub> H <sub>18</sub> O | monoterpene    |
| 16  | 12.64 | α-Terpineol                       | 1.64     | 1260  | C <sub>10</sub> H <sub>18</sub> O | monoterpene    |
| 17  | 12.78 | Estragole                         | 0.69     | 1196  | C <sub>10</sub> H <sub>12</sub> O | phenylpropene  |

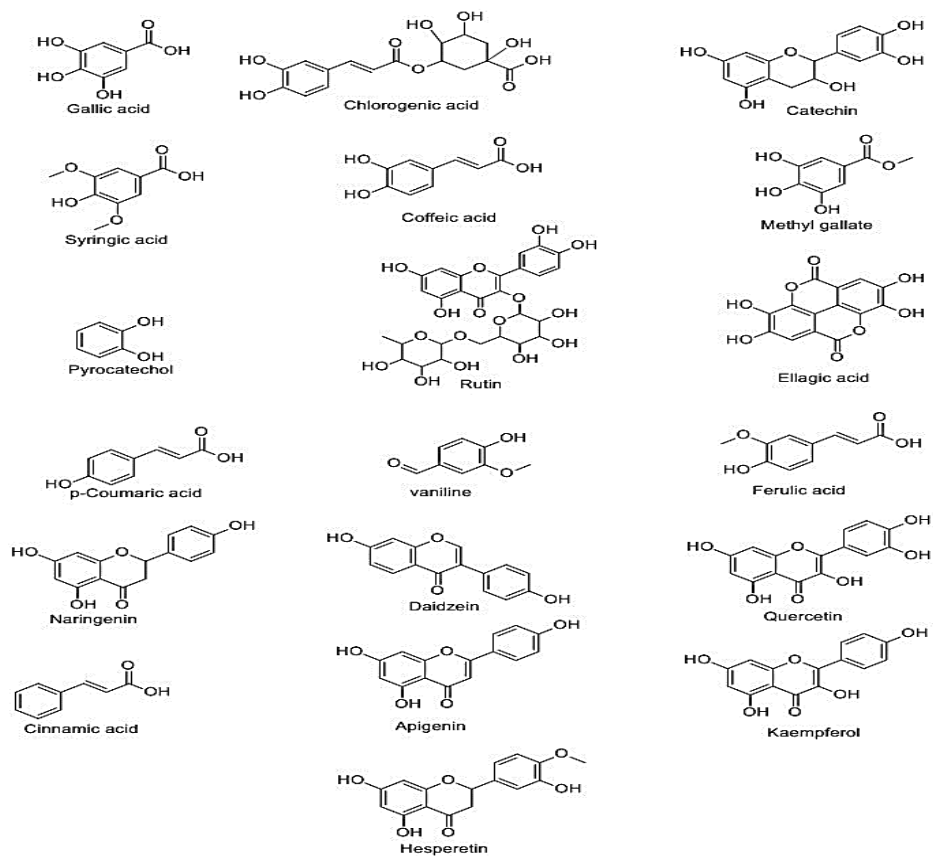

**Figure S1.** Structure of the tested polyphenol active components by HPLC.

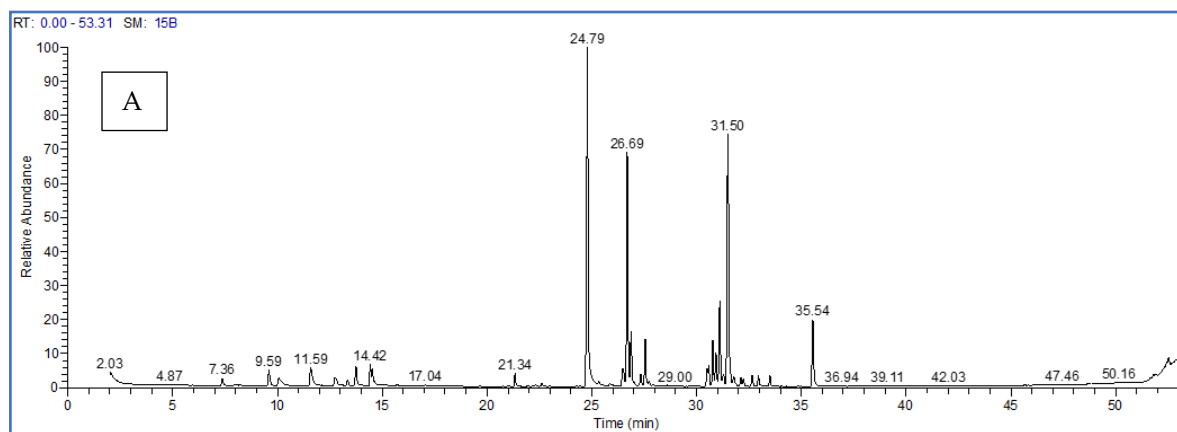

Figure S2. GC chromatogram of *Lonicera caprifolium* (a) and *Pogostemon cablin* (b) essential oils.

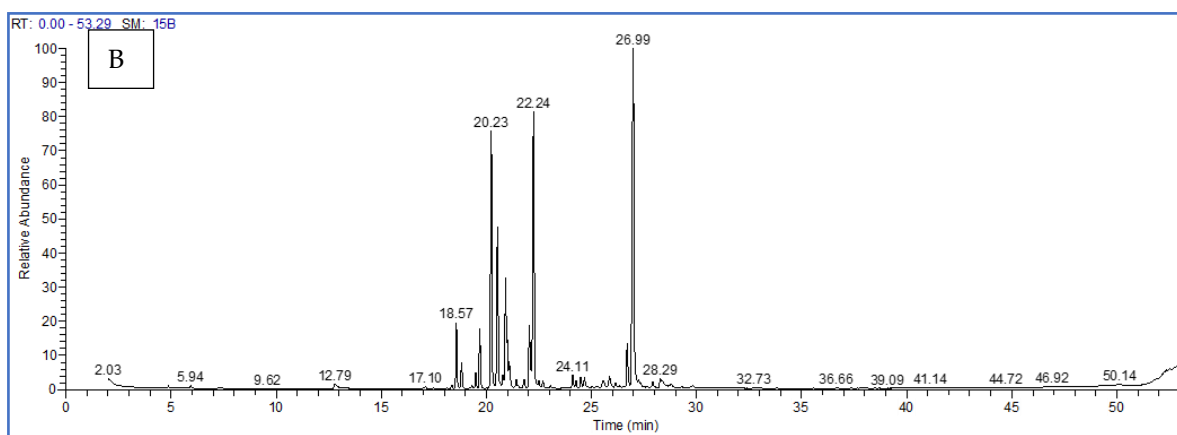

Supplement: s1 [file s1]
